# Supplementary material
Source: ML conference proceedings conference paper supplement (https://openaccess.thecvf.com/content/CVPR2021/html/Wang_Rich_Features_for_CVPR_2021_paper.html)
Supplement: Supplementary file 1 [file Wang_Rich_Features_for_CVPR_2021_supplemental.pdf]

---

# RICH FEATURES FOR PERCEPTUAL QUALITY ASSESSMENT OF UGC VIDEOS

---

## SUPPLEMENTARY MATERIALS

Yilin Wang, Junjie Ke, Hossein Talebi, Joong Gon Yim, Neil Birkbeck,  
Balu Adsumilli, Peyman Milanfar, Feng Yang  
Google Inc.

### 1 Subjective test platform for UGC-VQ dataset

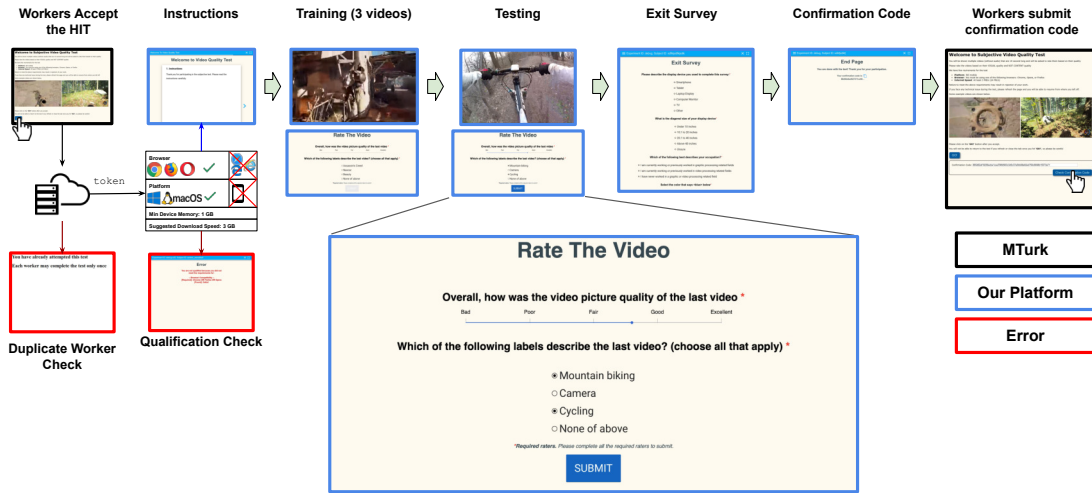

Figure 1: Subjective test platform overview

We utilized Mechanical Turk (MTurk) to delegate the recruitment and payment process. The external workers were redirected to our testing platform, which is a standalone web application. Figure 1 shows the step by step flow of the MTurk workers' journey through our subjective testing and the below steps highlight the details of the critical parts of the testing:

1. When MTurk workers entered our platform, we ran basic qualification checks, which was used to reject unqualified workers (e.g., poor Internet bandwidth or the display resolution is smaller than 700P), and also displayed detailed instructions about the test.
2. While Step 1 was in progress, we downloaded the videos to the workers' local drive to decouple network related issues from the quality assessment.
3. After watching the entire clip, workers were asked to rate the clip on the picture quality and to choose all relevant labels. Each clip had a different set of labels as options for the second question.
4. At the end of the test, exit survey questions were asked to collect basic demographic information about the workers.

Since our corpus was larger than what a single worker could watch within a reasonable time frame, we sampled subset of videos from the testing corpus. We showed three training videos in the beginning to get the workers familiar with our platform and to calibrate workers with the same quality range because each subset had different ranges of quality. The actual stimuli were randomly shuffled while making sure the variants from the same video ID were not shown consecutively.

## 2 Comparison of aggregation models

We compared the three feature aggregation models (AvgPool, LSTM, and ConvLSTM) by their MOS correlations with all combinations of features. As shown in Table 1, for all three models the combined features performs better than a single feature, and CP+CT+DT has the highest correlation on all three models. It means the three extracted features are all highly related to perceptual quality. AvgPool has better correlations than LSTM and ConvLSTM in most cases, which suggests that the majority of UGC videos still have relatively consistent quality. ConvLSTM outperforms LSTM on single features, but the advantage decreases in combined feature cases. For fine-tuning on such small datasets (around 1k samples, which is common for video quality assessment), complicated models may not perform better than relatively simple models. Thus in this paper, we choose AvgPool as our default AggregationNet.

| Feature  | AvgPool      |              |              | LSTM  |       |       | ConvLSTM |       |       |
|----------|--------------|--------------|--------------|-------|-------|-------|----------|-------|-------|
|          | PLCC         | SROCC        | RMSE         | PLCC  | SROCC | RMSE  | PLCC     | SROCC | RMSE  |
| CP       | 0.770        | 0.785        | 0.408        | 0.674 | 0.684 | 0.473 | 0.717    | 0.727 | 0.445 |
| CT       | 0.628        | 0.628        | 0.495        | 0.584 | 0.574 | 0.518 | 0.621    | 0.618 | 0.502 |
| DT       | 0.726        | 0.744        | 0.434        | 0.722 | 0.727 | 0.443 | 0.752    | 0.758 | 0.422 |
| CP+CT    | 0.787        | 0.801        | 0.395        | 0.739 | 0.741 | 0.430 | 0.734    | 0.732 | 0.436 |
| CP+DT    | 0.790        | 0.802        | 0.391        | 0.768 | 0.773 | 0.408 | 0.774    | 0.778 | 0.407 |
| CT+DT    | 0.750        | 0.767        | 0.421        | 0.730 | 0.739 | 0.437 | 0.730    | 0.735 | 0.437 |
| CP+CT+DT | <b>0.802</b> | <b>0.816</b> | <b>0.382</b> | 0.767 | 0.771 | 0.411 | 0.760    | 0.764 | 0.418 |

Table 1: Comparison of different temporal aggregation models on YT-UGC original MOS.

## 3 Comparison on model complexity

Our default backbone model for ContentNet and DistortionNet is EfficientNet-b0 (pretrained on ImageNet). In this section, we will investigate whether a more complex model could achieve better performance. We use EfficientNet-b7 (pretrained on ImageNet) as the alternative model, to evaluate the impact of model complexity on overall quality prediction. The complexity of EfficientNet-b0 and EfficientNet-b7 are 0.39B FLOPs and 37B FLOPs, respectively.

First, we use Efficient-b0 and Efficient-b7 as the backbone for ContentNet to extract content features. These features are then combined with other features in our AggregationNet (AvgPool) to predict the YT-UGC MOS (Table 2) and the UGC-VQ DMOS (Table 3). We can see EfficientNet-b7 does not achieve correlations higher than EfficientNet-b0 (actually slightly worse) in single feature model (CT) as well as the combined feature models. This means that more complicated models do not always provide more useful features. Thus, EfficientNet-b0 is the best option for our CoINVQ model.

| Feature  | EfficientNet-b0 |              |              | EfficientNet-b7 |       |       |
|----------|-----------------|--------------|--------------|-----------------|-------|-------|
|          | PLCC            | SROCC        | RMSE         | PLCC            | SROCC | RMSE  |
| CT       | 0.628           | 0.628        | 0.495        | 0.615           | 0.607 | 0.498 |
| CP+CT    | 0.787           | 0.801        | 0.395        | 0.774           | 0.778 | 0.405 |
| CT+DT    | 0.750           | 0.767        | 0.421        | 0.752           | 0.770 | 0.421 |
| CP+CT+DT | <b>0.802</b>    | <b>0.816</b> | <b>0.382</b> | 0.796           | 0.806 | 0.387 |

Table 2: Comparison of different ContentNet backbone on YT-UGC original MOS.

| Feature      | EfficientNet-b0 |              |              | EfficientNet-b7 |       |       |
|--------------|-----------------|--------------|--------------|-----------------|-------|-------|
|              | PLCC            | SROCC        | RMSE         | PLCC            | SROCC | RMSE  |
| CT           | 0.584           | 0.526        | 0.106        | 0.357           | 0.373 | 0.130 |
| <b>CP+CT</b> | <b>0.672</b>    | <b>0.613</b> | <b>0.192</b> | 0.652           | 0.602 | 0.214 |
| CT+DT        | 0.390           | 0.387        | 0.201        | 0.334           | 0.347 | 0.215 |
| CP+CT+DT     | 0.539           | 0.522        | 0.203        | 0.497           | 0.481 | 0.223 |

Table 3: Comparison of different ContentNet backbone on UGC-VQ DMOS.

| Model                     | PLCC   | SROCC  | RMSE   |
|---------------------------|--------|--------|--------|
| EfficientNet-b0(frozen)   | 0.624  | 0.612  | 0.509  |
| EfficientNet-b0(finetime) | 0.671  | 0.690  | 0.474  |
| EfficientNet-b7(frozen)   | 0.5447 | 0.5435 | 0.5364 |
| EfficientNet-b7(finetime) | 0.6035 | 0.5961 | 0.5147 |
| CoINVQ (CT)               | 0.628  | 0.628  | 0.495  |
| CoINVQ (CP+CT)            | 0.787  | 0.801  | 0.395  |
| CoINVQ (CT+DT)            | 0.750  | 0.767  | 0.421  |
| CoINVQ (CP+CT+DT)         | 0.802  | 0.816  | 0.382  |

Table 4: Comparison of EfficientNet-b0 and EfficientNet-b7 on YT-UGC original MOS.

We also evaluate the direct influence of the model size on the overall quality prediction performance. We test two frame-based models: EfficientNet-b0 and EfficientNet-b7 (pretrained on ImageNet). Each model has two retraining strategies: frozen (model weights with a trainable head) and finetuned (all model weights are trainable). Table 4 shows the correlations on YT-UGC original MOS, where we still use the 5-fold cross-validation with consistent splits for all tests and report average results over the test folds. We can see again EfficientNet-b7 did not give better correlation, and is much worse than our CoINVQ models. This suggests that more comprehensive features can bring more gains than more complicated models for video quality assessment.

To evaluate the benefit of retraining on YT8M content labels, we ran another experiment to compare the performance of the ContentNet features (retrained on YT8M), and features from EfficientNet (pretrained on ImageNet). These content features are directly used to train (not combined with other features) on YT-UGC original MOS. Then, the trained models are used to predict DMOS for UGC-VQ dataset without retraining. Both ContentNet and EfficientNet have two backbone networks (b0 and b7). Results are shown in Table 5. We found out that after retraining on the YT8M content labels, the models achieve significantly better correlations than the models just trained on ImageNet. This means that retraining on UGC content labels is necessary for the UGC quality assessment.

| Dataset     | ContentNet-b0 |       |       | ContentNet-b7 |       |       | EfficientNet-b0 |       |       | EfficientNet-b7 |       |       |
|-------------|---------------|-------|-------|---------------|-------|-------|-----------------|-------|-------|-----------------|-------|-------|
|             | PLCC          | SROCC | RMSE  | PLCC          | SROCC | RMSE  | PLCC            | SROCC | RMSE  | PLCC            | SROCC | RMSE  |
| YT-UGC MOS  | 0.628         | 0.628 | 0.495 | 0.615         | 0.607 | 0.498 | 0.586           | 0.577 | 0.517 | 0.583           | 0.565 | 0.519 |
| UGC-VQ DMOS | 0.584         | 0.526 | 0.106 | 0.357         | 0.373 | 0.130 | 0.485           | 0.395 | 0.119 | 0.392           | 0.396 | 0.122 |

Table 5: Performance of different content features used in CoINVQ(CT) model on YT-UGC MOS and UGC-VQ DMOS.

## 4 Scatter Plots for predictions and ground truth

### 4.1 YT-UGC original MOS: Table 6

### 4.2 KoNViD-1k original MOS (not retrained): Table 7

### 4.3 UGC-VQ DMOS (not retrained): Table 8

## 5 More CoINVQ diagnosis reports on YT-UGC dataset

Here we list CoINVQ diagnosis reports for samples from YT0-UGC dataset (sorted by MOS in ascending order). Compression level (in [0, 1]), top-10 content labels, and top 5 distortion types are reported (sorted by predicted probability in descending order). Quality scores predicted by a single feature (CP, CT, DT) and combined features (CP+CT+DT) are shown as well as ground truth MOS. We can see for most samples, predicted overall quality scores are close to MOS, and quality indicators are helpful to understand the generic video quality. Several videos (e.g., Sports\_720P-069c) whose scores predicted by single features (e.g., CT) are closer to the ground truth than the scores predicted by combined features, which suggests that there are still room of improvement for feature aggregation.

All scores are averaged for the entire 20s videos, so selected frames may not fully represent the overall video quality. Full videos can be accessed by clicking corresponding vids. Due to the license issue, the link will be disabled if the video was removed from YT-UGC dataset.

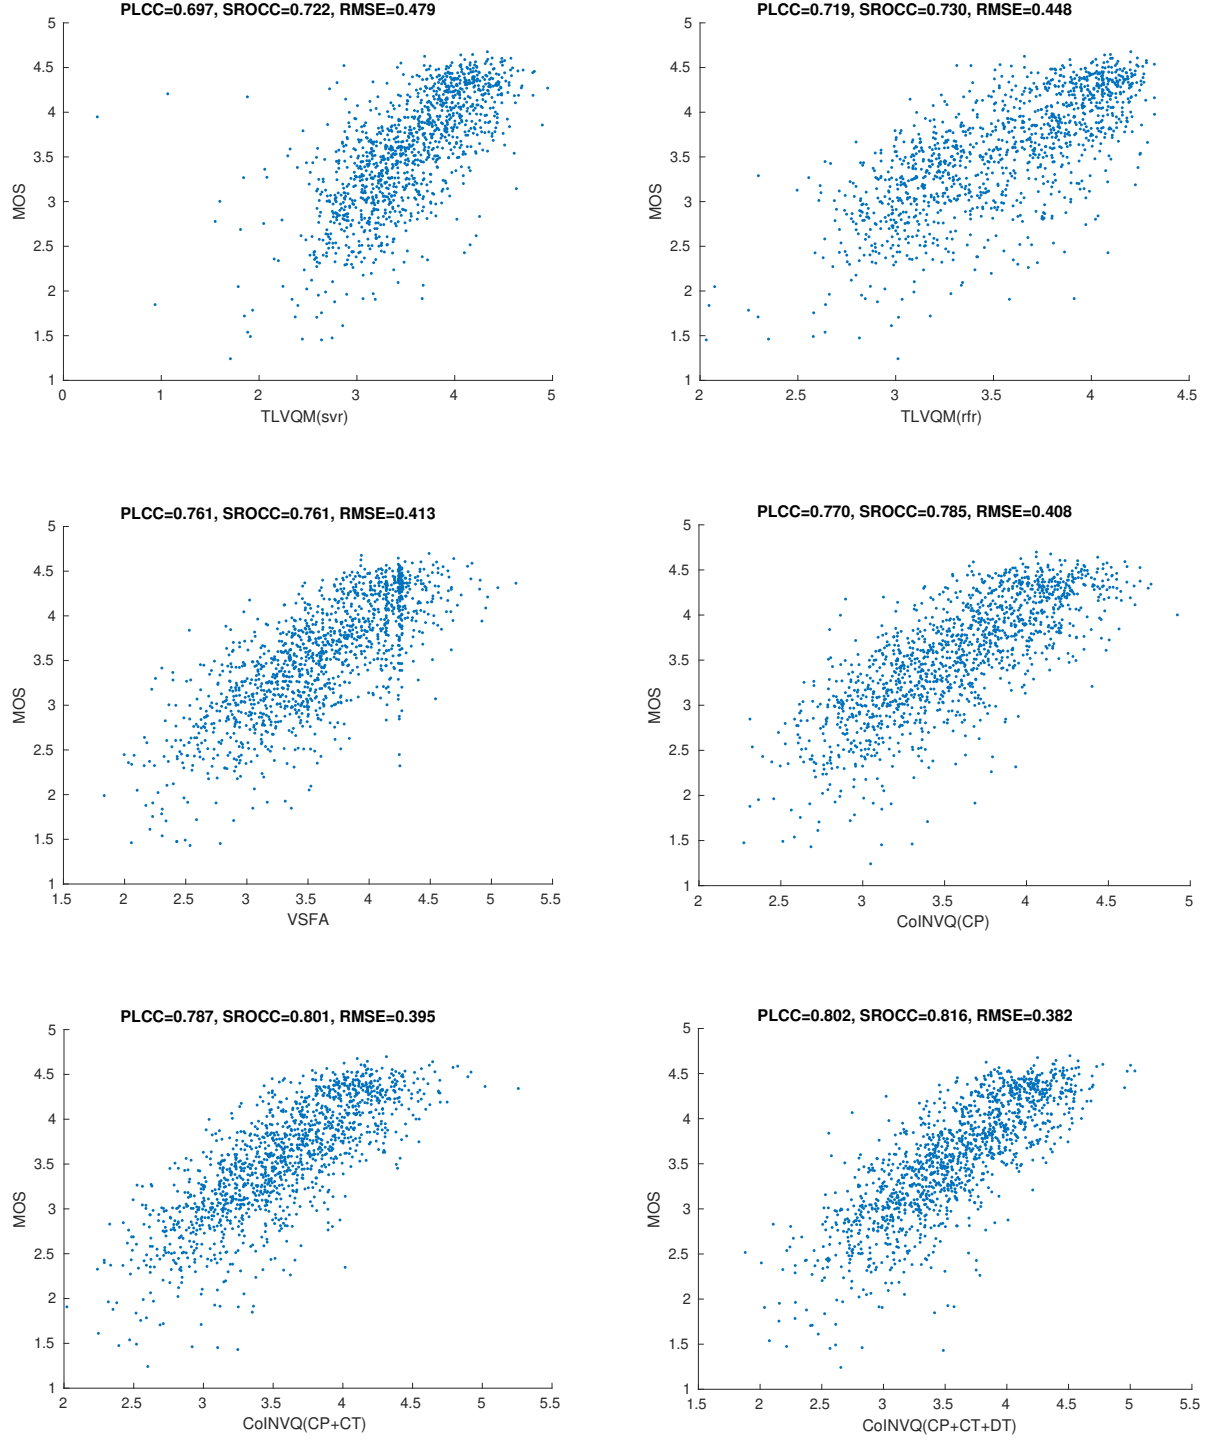

Table 6: Scatter plots for metrics on YT-UGC MOS.

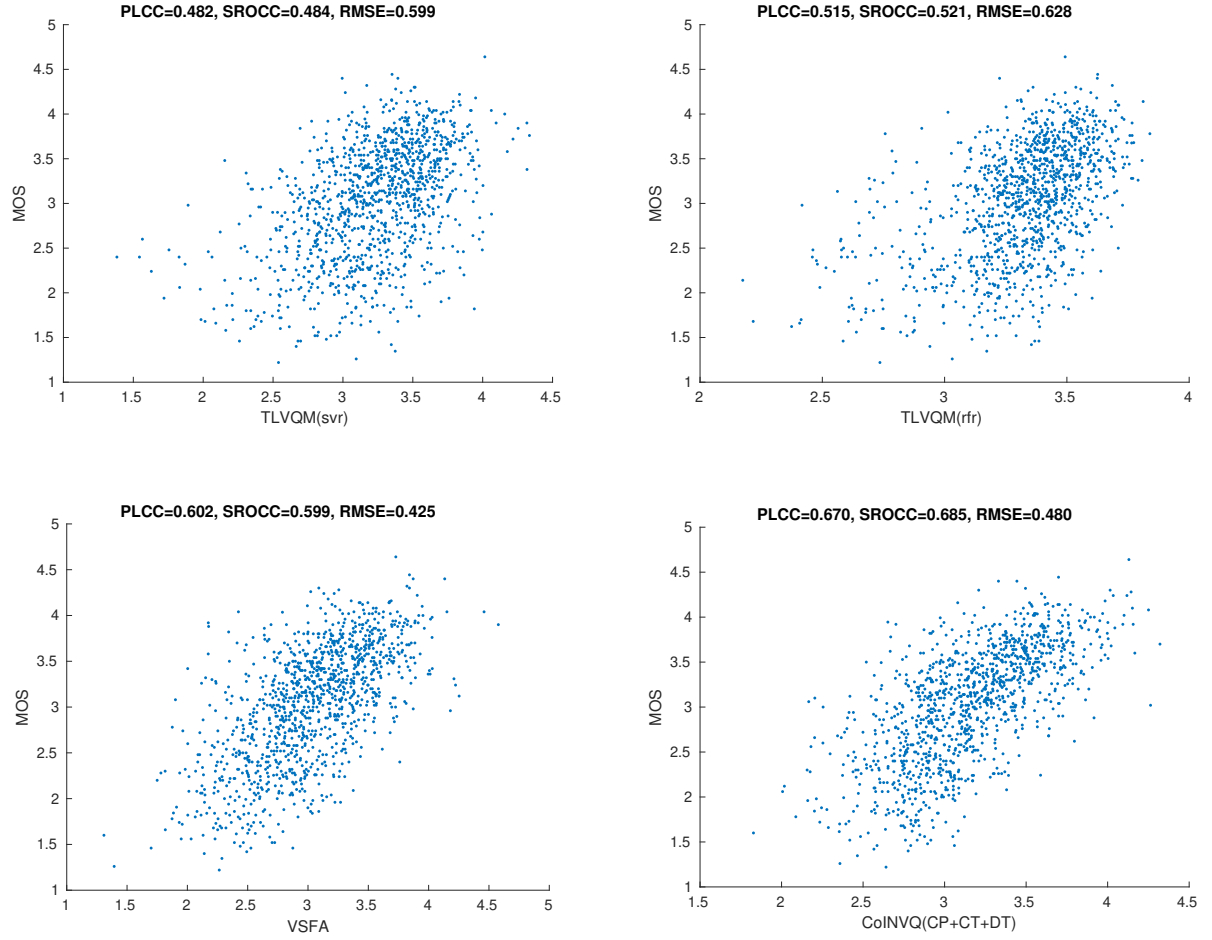

Table 7: Scatter plots for metrics on KoNViD-1k MOS (not retrained).

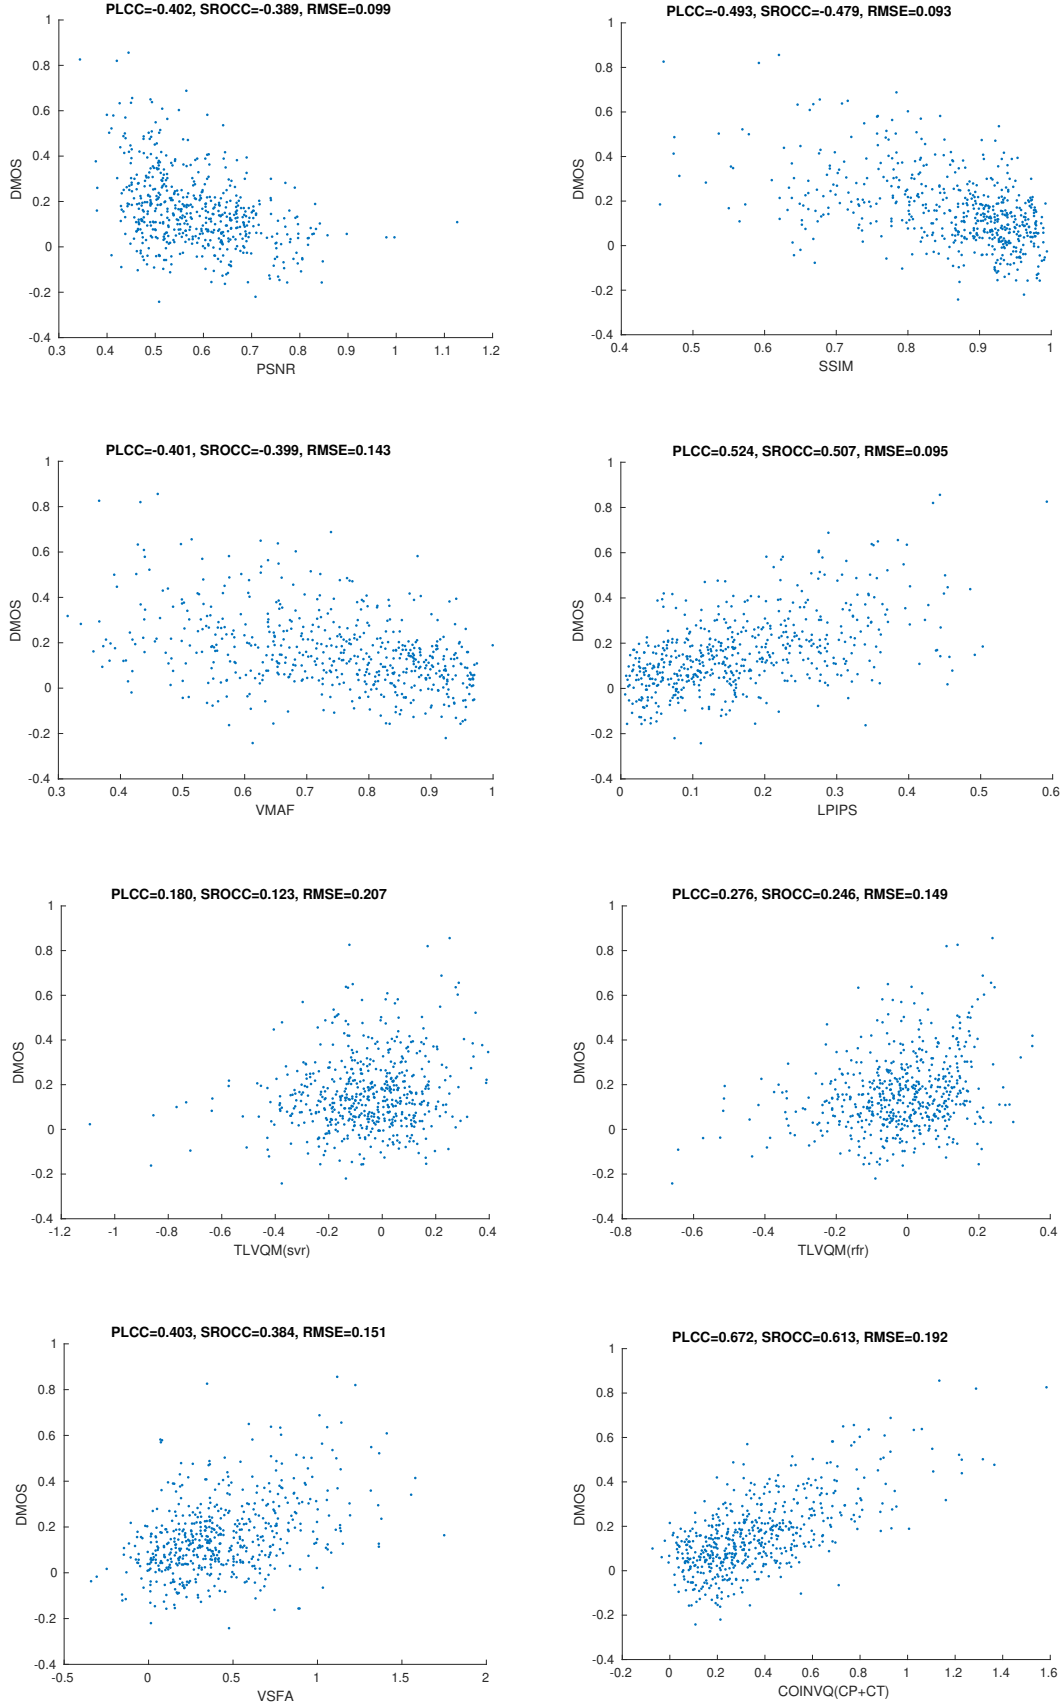

Table 8: Scatter plots for metrics on UGC-VQ DMOS (not retrained).

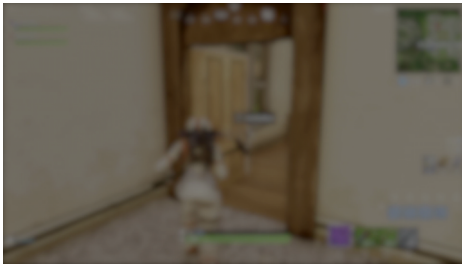

Video link: [HDR\\_1080P-1e5b](#)

#### CoINVQ diagnosis report

|                   |                                                                                                  |
|-------------------|--------------------------------------------------------------------------------------------------|
| Compression level | 0.067                                                                                            |
| Content labels    | Video game, Food, Vehicle, Music video, Minecraft, Animal, Trailer (promotion), Car, Guitar, Pet |
| Distortion types  | Lens blur, Multiplicative noise, Gaussian blur, Denoise, JPEG2000                                |
| (CP, CT, DT)      | (3.048, 2.619, 2.792)                                                                            |
| <b>CP+CT+DT</b>   | <b>2.654</b>                                                                                     |

**MOS (ground truth)** 1.242

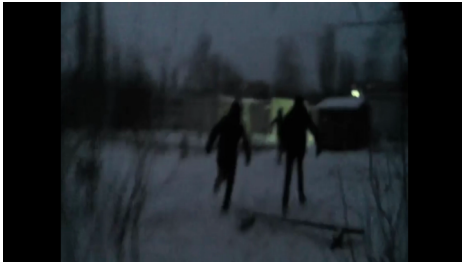

Video link: [TelevisionClip\\_1080P-3e42](#)

#### CoINVQ diagnosis report

|                   |                                                                                                             |
|-------------------|-------------------------------------------------------------------------------------------------------------|
| Compression level | 0.225                                                                                                       |
| Content labels    | Video game, Trailer (promotion), Music video, Vehicle, Animal, Car, Concert, Musician, Performance art, Pet |
| Distortion types  | Denoise, Lens blur, Jitter, Color quantization, Color saturation 2                                          |
| (CP, CT, DT)      | (2.861, 2.599, 2.713)                                                                                       |
| <b>CP+CT+DT</b>   | <b>2.621</b>                                                                                                |

**MOS (ground truth)** 1.989

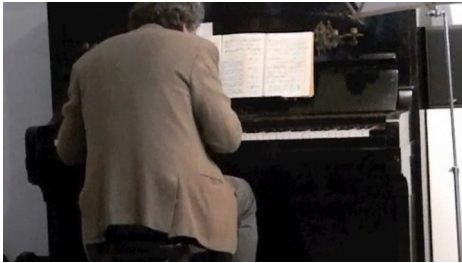

Video link: [LiveMusic\\_360P-5b57](#)

#### CoINVQ diagnosis report

|                   |                                                                                                      |
|-------------------|------------------------------------------------------------------------------------------------------|
| Compression level | 0.794                                                                                                |
| Content labels    | Vehicle, Musician, Guitar, String instrument, Car, Food, Video game, Motorcycle, Animal, Music video |
| Distortion types  | Color saturation 2, Multiplicative noise, Gaussian blur, Lens blur, Denoise                          |
| (CP, CT, DT)      | (2.605, 3.301, 2.826)                                                                                |
| <b>CP+CT+DT</b>   | <b>2.718</b>                                                                                         |

**MOS (ground truth)** 2.773

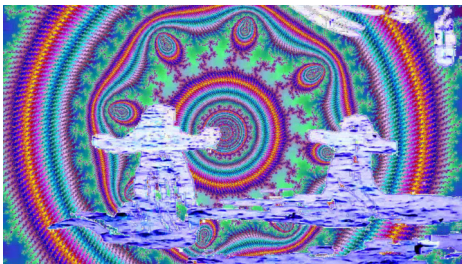

Video link: [CoverSong\\_720P-10f1](#)

#### CoINVQ diagnosis report

|                   |                                                                                           |
|-------------------|-------------------------------------------------------------------------------------------|
| Compression level | 0.155                                                                                     |
| Content labels    | Cartoon, Toy, Dance, Performance art, Animation, Animal, Slam dunk, Video game, Doll, Art |
| Distortion types  | Jitter, Contrast change, Color block, Darken, White noise in color component              |
| (CP, CT, DT)      | (3.383, 3.835, 2.412)                                                                     |
| <b>CP+CT+DT</b>   | <b>2.248</b>                                                                              |

**MOS (ground truth)** 2.805

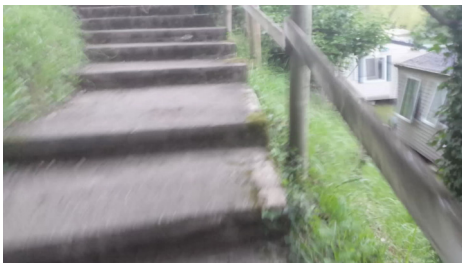

Video link: [Vlog\\_1080P-45c9](#)

#### CoINVQ diagnosis report

|                   |                                                                                               |
|-------------------|-----------------------------------------------------------------------------------------------|
| Compression level | 0.069                                                                                         |
| Content labels    | Vehicle, Car, Video game, Animal, Pet, Train, Rail transport, Fishing, Food, Musical keyboard |
| Distortion types  | Quantization, Denoise, Lens blur, JPEG2000, Gaussian blur                                     |
| (CP, CT, DT)      | (3.570, 3.268, 3.164)                                                                         |
| <b>CP+CT+DT</b>   | <b>3.296</b>                                                                                  |

**MOS (ground truth)** 2.888



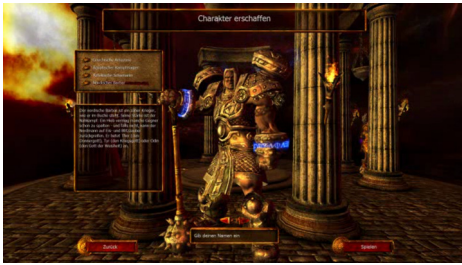

Video link: [Gaming\\_360P-586d](#)

#### CoINVQ diagnosis report

|                   |                                                                                                                                                 |
|-------------------|-------------------------------------------------------------------------------------------------------------------------------------------------|
| Compression level | 0.145                                                                                                                                           |
| Content labels    | Video game, Guitar, Musician, String instrument, Strategy video game, Warcraft, World of Warcraft, Minecraft, Trailer (promotion), Call of Duty |
| Distortion types  | Gaussian blur, Pixelate, Color saturation 2, Mean shift, Color saturation 1                                                                     |
| (CP, CT, DT)      | (3.465, 3.509, 3.173)                                                                                                                           |
| <b>CP+CT+DT</b>   | <b>3.228</b>                                                                                                                                    |

**MOS (ground truth)** 3.026

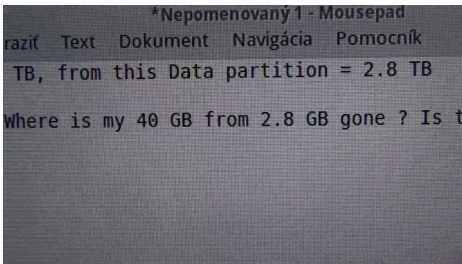

Video link: [HowTo\\_720P-3813](#)

#### CoINVQ diagnosis report

|                   |                                                                                             |
|-------------------|---------------------------------------------------------------------------------------------|
| Compression level | 0.137                                                                                       |
| Content labels    | Vehicle, Video game, Car, Musician, Cartoon, Guitar, Dance, Food, Mobile phone, Photography |
| Distortion types  | Denoise, Lens blur, Quantization, JPEG2000, Color shift                                     |
| (CP, CT, DT)      | (3.228, 3.770, 3.870)                                                                       |
| <b>CP+CT+DT</b>   | <b>3.738</b>                                                                                |

**MOS (ground truth)** 3.072

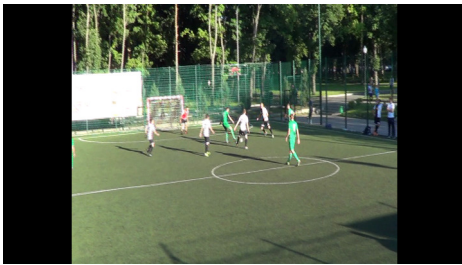

Video link: [Sports\\_480P-0623](#)

#### CoINVQ diagnosis report

|                   |                                                                                                       |
|-------------------|-------------------------------------------------------------------------------------------------------|
| Compression level | 0.197                                                                                                 |
| Content labels    | Video game, Vehicle, Animal, Trailer (promotion), Association football, Guitar, Pet, Car, Food, Dance |
| Distortion types  | White noise in color component, Unknown, Denoise, Contrast change, Lens blur                          |
| (CP, CT, DT)      | (2.924, 3.241, 2.958)                                                                                 |
| <b>CP+CT+DT</b>   | <b>2.943</b>                                                                                          |

**MOS (ground truth)** 3.106

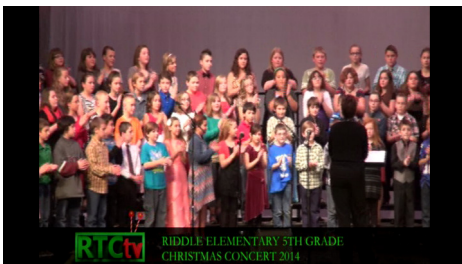

Video link: [LiveMusic\\_480P-1a91](#)

#### CoINVQ diagnosis report

|                   |                                                                                                                    |
|-------------------|--------------------------------------------------------------------------------------------------------------------|
| Compression level | 0.147                                                                                                              |
| Content labels    | Video game, Concert, Vehicle, Musician, Performance art, Car, Trailer (promotion), Guitar, Dance, Musical ensemble |
| Distortion types  | Gaussian blur, Unknown, Pixelate, Lens blur, Denoise                                                               |
| (CP, CT, DT)      | (3.294, 3.092, 2.960)                                                                                              |
| <b>CP+CT+DT</b>   | <b>3.086</b>                                                                                                       |

**MOS (ground truth)** 3.173

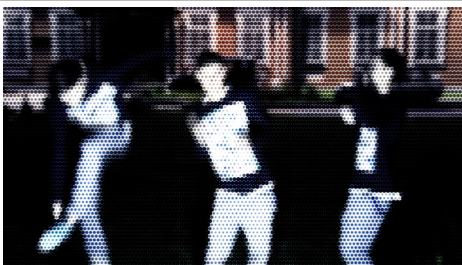

Video link: [Vlog\\_2160P-217c](#)

#### CoINVQ diagnosis report

|                   |                                                                                                        |
|-------------------|--------------------------------------------------------------------------------------------------------|
| Compression level | 0.021                                                                                                  |
| Content labels    | Concert, Performance art, Musician, Dance, Musical ensemble, Vehicle, Car, Video game, Guitar, Cartoon |
| Distortion types  | Gaussian blur, Denoise, Quantization, Non-eccentricity patch, Multiplicative noise                     |
| (CP, CT, DT)      | (3.526, 3.190, 3.476)                                                                                  |
| <b>CP+CT+DT</b>   | <b>3.494</b>                                                                                           |

**MOS (ground truth)** 3.202



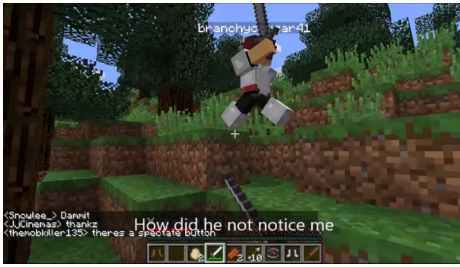

Video link: [Animation\\_480P-6ff4](#)

#### CoINVQ diagnosis report

|                   |                                                                                                                          |
|-------------------|--------------------------------------------------------------------------------------------------------------------------|
| Compression level | 0.543                                                                                                                    |
| Content labels    | Video game, Minecraft, Strategy video game, Food, World of Warcraft, Nature, Combat, Animal, Dance, Association football |
| Distortion types  | Jitter, Non-eccentricity patch, Unknown, Lens blur, Impulse noise                                                        |
| (CP, CT, DT)      | (3.361, 3.675, 3.245)                                                                                                    |
| <b>CP+CT+DT</b>   | <b>3.379</b>                                                                                                             |

**MOS (ground truth)** 3.290

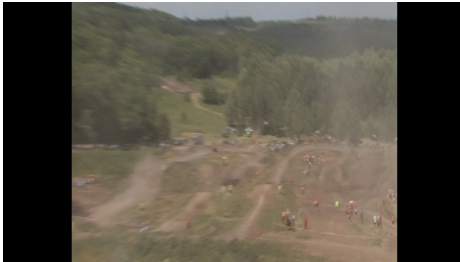

Video link: [Sports\\_480P-6508](#)

#### CoINVQ diagnosis report

|                   |                                                                                          |
|-------------------|------------------------------------------------------------------------------------------|
| Compression level | 0.042                                                                                    |
| Content labels    | Vehicle, Video game, Car, Mobile phone, Animal, Smartphone, Gadget, Motorsport, Pet Food |
| Distortion types  | Jitter, Color quantization, Lens blur, Denoise, Pixelate                                 |
| (CP, CT, DT)      | (2.932, 2.934, 3.316)                                                                    |
| <b>CP+CT+DT</b>   | <b>3.476</b>                                                                             |

**MOS (ground truth)** 3.448

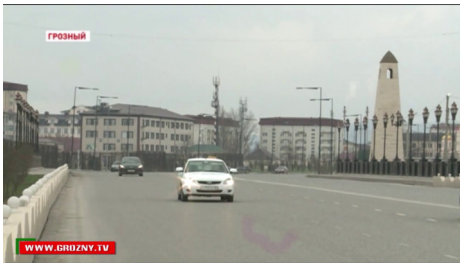

Video link: [NewsClip\\_720P-4603](#)

#### CoINVQ diagnosis report

|                   |                                                                                                    |
|-------------------|----------------------------------------------------------------------------------------------------|
| Compression level | 0.190                                                                                              |
| Content labels    | Vehicle, Car, Video game, Train, Food, Rail transport, Musical keyboard, Animal, Railroad car, Pet |
| Distortion types  | Lens blur, Quantization, JPEG2000, Denoise, Color shift                                            |
| (CP, CT, DT)      | (3.483, 3.484, 3.562)                                                                              |
| <b>CP+CT+DT</b>   | <b>3.436</b>                                                                                       |

**MOS (ground truth)** 3.454

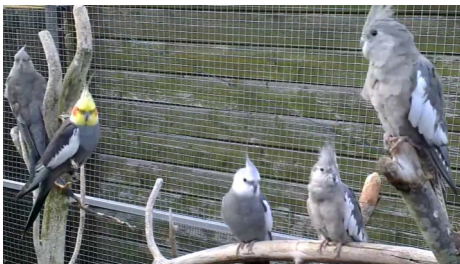

Video link: [Vlog\\_720P-329f](#)

#### CoINVQ diagnosis report

|                   |                                                                                                           |
|-------------------|-----------------------------------------------------------------------------------------------------------|
| Compression level | 0.283                                                                                                     |
| Content labels    | Animal, Pet, Guitar, Vehicle, Food, Video game, Train, Association football, String instrument, Orchestra |
| Distortion types  | Lens blur, Quantization, JPEG2000, Denoise, Mean shift                                                    |
| (CP, CT, DT)      | (3.654, 3.403, 3.828)                                                                                     |
| <b>CP+CT+DT</b>   | <b>3.747</b>                                                                                              |

**MOS (ground truth)** 3.700

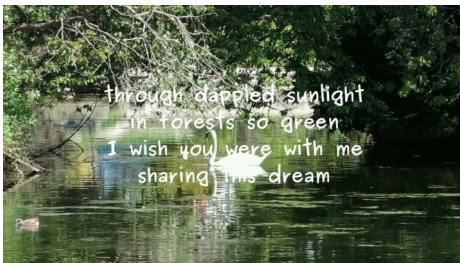

Video link: [LyricVideo\\_720P-0ae4](#)

#### CoINVQ diagnosis report

|                   |                                                                                                      |
|-------------------|------------------------------------------------------------------------------------------------------|
| Compression level | 0.102                                                                                                |
| Content labels    | Vehicle, Animal, Car, Pet, Slam dunk, Food, Orchestra, Musical keyboard, Fishing, Outdoor recreation |
| Distortion types  | Lens blur, Denoise, JPEG2000, Quantization, Mean shift                                               |
| (CP, CT, DT)      | (3.778, 3.348, 4.032)                                                                                |
| <b>CP+CT+DT</b>   | <b>3.824</b>                                                                                         |

**MOS (ground truth)** 3.717

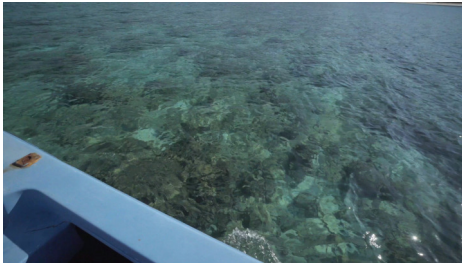

Video link: [Vlog\\_2160P-4655](#)

#### CoINVQ diagnosis report

|                   |                                                                                                                        |
|-------------------|------------------------------------------------------------------------------------------------------------------------|
| Compression level | 0.016                                                                                                                  |
| Content labels    | Video game, Strategy video game, Fishing, Pet, World of Warcraft, The Sims, Animal, Fish, Vehicle, Trailer (promotion) |
| Distortion types  | Gaussian blur, Multiplicative noise, Color saturation 2, Lens blur, Denoise                                            |
| (CP, CT, DT)      | (3.666, 3.545, 3.639)                                                                                                  |
| <b>CP+CT+DT</b>   | <b>3.728</b>                                                                                                           |

**MOS (ground truth)** 3.887

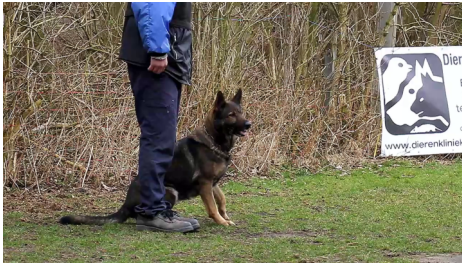

Video link: [Sports\\_720P-0b9e](#)

#### CoINVQ diagnosis report

|                   |                                                                                                   |
|-------------------|---------------------------------------------------------------------------------------------------|
| Compression level | 0.226                                                                                             |
| Content labels    | Animal, Vehicle, Pet, Musical keyboard, Rail transport, Car, Food, Train, Railroad car, Orchestra |
| Distortion types  | Impulse noise, Mean shift, Unknown, Color saturation 1, Jitter                                    |
| (CP, CT, DT)      | (3.723, 3.961, 3.556)                                                                             |
| <b>CP+CT+DT</b>   | <b>3.646</b>                                                                                      |

**MOS (ground truth)** 3.942

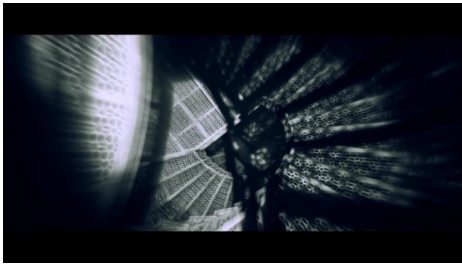

Video link: [LyricVideo\\_1080P-5461](#)

#### CoINVQ diagnosis report

|                   |                                                                                                                |
|-------------------|----------------------------------------------------------------------------------------------------------------|
| Compression level | 0.093                                                                                                          |
| Content labels    | Video game, Music video, Trailer (promotion), Concert, Car, Vehicle, Performance art, Musician, Guitar, Animal |
| Distortion types  | Denoise, Gaussian blur, Quantization, Mean shift, Lens blur                                                    |
| (CP, CT, DT)      | (3.516, 3.231, 3.304)                                                                                          |
| <b>CP+CT+DT</b>   | <b>3.367</b>                                                                                                   |

**MOS (ground truth)** 4.031

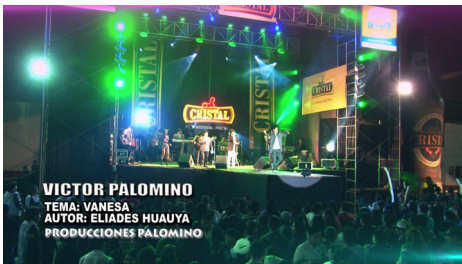

Video link: [LiveMusic\\_1080P-6b1c](#)

#### CoINVQ diagnosis report

|                   |                                                                                                                |
|-------------------|----------------------------------------------------------------------------------------------------------------|
| Compression level | 0.124                                                                                                          |
| Content labels    | Concert, Musician, Video game, Vehicle, Guitar, Musical ensemble, Call of Duty, Drum kit, Performance art, Car |
| Distortion types  | Contrast change, Non-eccentricity patch, Impulse noise, Color quantization, White noise in color component     |
| (CP, CT, DT)      | (4.164, 3.606, 4.245)                                                                                          |
| <b>CP+CT+DT</b>   | <b>4.100</b>                                                                                                   |

**MOS (ground truth)** 4.255

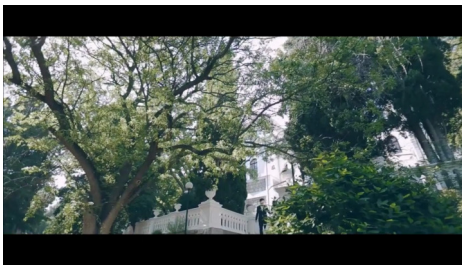

Video link: [MusicVideo\\_480P-5461](#)

#### CoINVQ diagnosis report

|                   |                                                                                              |
|-------------------|----------------------------------------------------------------------------------------------|
| Compression level | 0.066                                                                                        |
| Content labels    | Vehicle, Music video, Cartoon, Car, Video game, Art, Drawing, Mobile phone, Food, Smartphone |
| Distortion types  | Lens blur, Denoise, Quantization, JPEG2000, Color saturation 2                               |
| (CP, CT, DT)      | (3.802, 3.751, 3.817)                                                                        |
| <b>CP+CT+DT</b>   | <b>3.921</b>                                                                                 |

**MOS (ground truth)** 4.272



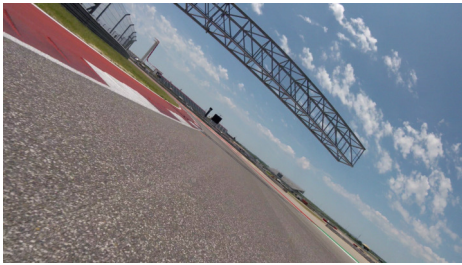

Video link: [Sports\\_2160P-349c](#)

#### CoINVQ diagnosis report

|                   |                                                                                                                        |
|-------------------|------------------------------------------------------------------------------------------------------------------------|
| Compression level | 0.020                                                                                                                  |
| Content labels    | Vehicle, Mobile phone, Car, Gadget, Airplane, Smartphone, Aircraft, Aircraft, Animal, Pokemon (video game series), Pet |
| Distortion types  | Quantization, Mean shift, JPEG2000, Denoise, Lens blur                                                                 |
| (CP, CT, DT)      | (4.237, 4.079, 4.936)                                                                                                  |
| <b>CP+CT+DT</b>   | <b>4.526</b>                                                                                                           |

**MOS (ground truth)** 4.302

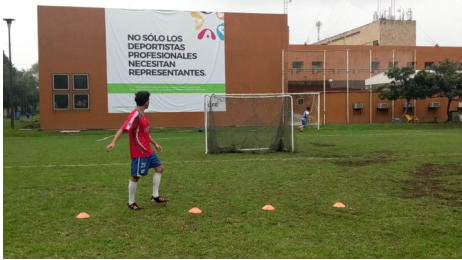

Video link: [Sports\\_1080P-43e2](#)

#### CoINVQ diagnosis report

|                   |                                                                                            |
|-------------------|--------------------------------------------------------------------------------------------|
| Compression level | 0.075                                                                                      |
| Content labels    | Association football, Vehicle, Food, Animal, Video game, Dance, Pet, Train, Minecraft, Car |
| Distortion types  | Lens blur, Impulse noise, Denoise, Color saturation 2, Color shift                         |
| (CP, CT, DT)      | (4.396, 4.300, 4.092)                                                                      |
| <b>CP+CT+DT</b>   | <b>4.254</b>                                                                               |

**MOS (ground truth)** 4.414

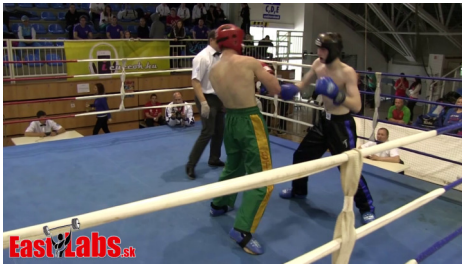

Video link: [Sports\\_720P-3338](#)

#### CoINVQ diagnosis report

|                   |                                                                                                                           |
|-------------------|---------------------------------------------------------------------------------------------------------------------------|
| Compression level | 0.096                                                                                                                     |
| Content labels    | Dance, Association football, Cycling, Video game, Choir, Musical ensemble, Animal, Vehicle, Basketball moves, Sports game |
| Distortion types  | Color shift, Contrast change, White noise in color component, Denoise, Mean shift                                         |
| (CP, CT, DT)      | (4.208, 3.585, 4.293)                                                                                                     |
| <b>CP+CT+DT</b>   | <b>4.378</b>                                                                                                              |

**MOS (ground truth)** 4.483

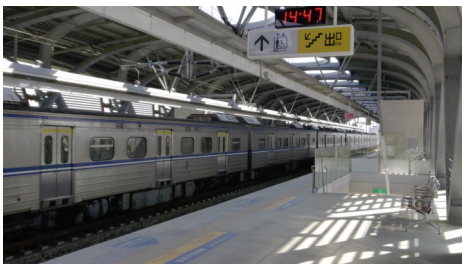

Video link: [HDR\\_1080P-2d32](#)

#### CoINVQ diagnosis report

|                   |                                                                                                          |
|-------------------|----------------------------------------------------------------------------------------------------------|
| Compression level | 0.014                                                                                                    |
| Content labels    | Food, Train, Minecraft, Vehicle, Rail transport, Video game, Musical keyboard, Railroad car, Engine, Car |
| Distortion types  | Lens blur, Mean shift, Quantization, Denoise, JPEG2000                                                   |
| (CP, CT, DT)      | (4.162, 4.135, 4.596)                                                                                    |
| <b>CP+CT+DT</b>   | <b>4.286</b>                                                                                             |

**MOS (ground truth)** 4.503

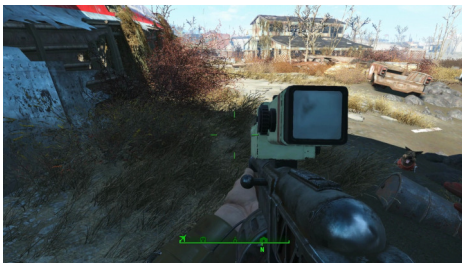

Video link: [Gaming\\_1080P-6dc6](#)

#### CoINVQ diagnosis report

|                   |                                                                                                                              |
|-------------------|------------------------------------------------------------------------------------------------------------------------------|
| Compression level | 0.005                                                                                                                        |
| Content labels    | Video game, Strategy video game, Minecraft, Vehicle, Combat, Cartoon, Warcraft, Battlefield, Call of Duty, World of Warcraft |
| Distortion types  | White noise in color component, Color shift, Contrast change, Denoise, Mean shift                                            |
| (CP, CT, DT)      | (4.312, 4.754, 4.621)                                                                                                        |
| <b>CP+CT+DT</b>   | <b>4.778</b>                                                                                                                 |

**MOS (ground truth)** 4.602
